# Supplementary material for: Herbal nanoemulsions in cosmetic science: A comprehensive review of design, preparation, formulation, and characterization
Source: PubMed Central journal article supplement — J Food Drug Anal. 2024 Dec 15;32(4):428–58. doi: 10.38212/2224-6614.3526 (PMC11698589; doi:10.38212/2224-6614.3526), 2024-12-15
Supplement: jfda-32-04-428-s001.pdf [file jfda-32-04-428-s001.pdf]

---

## *Research Highlights*

---

- Nanoemulsions represent an advanced technological strategy for the delivery of herbal active ingredients.
- The surfactants and co-surfactants play pivotal roles in defining the characteristics of herbal nanoemulsions.
- Low-energy and high-energy techniques are commonly used for the production of nanoemulsion.
- Stability is an essential factor for the effective recognition and development of herbal nanoemulsions.
